# Supplementary material for: Fe(ii) and Fe(iii) dithiocarbamate complexes as single source precursors to nanoscale iron sulfides: a combined synthetic and in situ XAS approach
Source: Royal Society of Chemistry journal article supplement (doi:10.1039/c9na00262f), 2019-01-01

## Fe(II) and Fe(III) dithiocarbamate complexes as single source precursors to nanoscale iron sulfides: A combined synthetic and *in-situ* XAS approach

Anna Roffey,<sup>a,b</sup> Nathan Hollingsworth<sup>b</sup>, Husn-Ubayda Islam<sup>b,c</sup>, Wim Bras<sup>c,d</sup>, Gopinathan Sankar<sup>b</sup>, Nora De Leeuw<sup>e</sup>, and Graeme Hogarth<sup>a\*</sup>

<sup>a</sup> Department of Chemistry, King's College London, Britannia House, 7 Trinity Street, London SE1 1DB, UK

<sup>b</sup> Department of Chemistry, University College London, 20 Gordon Street, London WC1H 0AJ, UK

<sup>c</sup> Netherlands Organisation for Scientific Research DUBBLE@ESRF, 38043 Grenoble, France

<sup>d</sup> Chemistry Division, Oak Ridge National Laboratory, Oak Ridge, Tennessee 37831, US

<sup>e</sup> School of Chemistry, Cardiff University, Main Building, Park Place, Cardiff, CF10 3AT, UK

### Synthesis of dithiocarbamate salts

**[H<sub>2</sub>NMe<sub>2</sub>][S<sub>2</sub>CNMe<sub>2</sub>]** Me<sub>2</sub>NH (15 mmol, 7.50 mL of a 2M solution in THF) was dissolved in further THF (20 mL) CS<sub>2</sub> (0.45 mL, 7.5 mmol) was added slowly dropwise over five mins whereupon a white precipitate began to form. The mixture was stirred for two h, filtered using a Büchner funnel and washed with THF (3 x 10 mL). Yield 1.1200 g, 90 %. <sup>1</sup>H NMR δ/ppm (CDCl<sub>3</sub>): 2.78 (s, 6H, CH<sub>3</sub>), 3.58 (s, 6H, CH<sub>3</sub>), 8.42 (broad s, 2H, [(CH<sub>3</sub>)<sub>2</sub>NH<sub>2</sub>]). <sup>13</sup>C{<sup>1</sup>H} NMR δ/ppm (CDCl<sub>3</sub>): 35.4 (CH<sub>3</sub>), 44.8 (CH<sub>3</sub>), 210.2 (CS<sub>2</sub>). **Anal.** **Calc. for C<sub>5</sub>H<sub>14</sub>N<sub>2</sub>S<sub>2</sub>:** C, 36.11; H, 8.49; N, 16.84. Found: C, 35.56; H, 8.38; N, 16.57. **MS(EI):** *m/z* 121 [S<sub>2</sub>CN(CH<sub>3</sub>)<sub>2</sub> + H<sup>+</sup>].

**[NMe<sub>4</sub>][S<sub>2</sub>CNEt<sub>2</sub>]** To an ice-cooled solution of Me<sub>4</sub>NOH (10 mmol, 3.65 g of a 25% wt solution in methanol) and Et<sub>2</sub>NH (10 mmol) in methanol (50 mL), CS<sub>2</sub> (10 mmol, 0.60 mL) was added dropwise over five mins. The solution was allowed to come to room temperature and stirred overnight. Methanol was removed *in vacuo* resulting in a pale yellow crystalline powder. Yield 2.2075 g, 99 %. <sup>1</sup>H NMR δ/ppm (CDCl<sub>3</sub>): 1.23 (t, 6H, J

= 7.0 Hz,  $\text{CH}_2\text{CH}_3$ ), 4.14 (q, 4H,  $J$  = 7.0 Hz,  $\text{CH}_2\text{CH}_3$ ).  $^{13}\text{C}\{^1\text{H}\}$  NMR  $\delta$ /ppm ( $\text{CDCl}_3$ ): 12.7 ( $\text{CH}_2\text{CH}_3$ ), 47.5 ( $\text{CH}_2\text{CH}_3$ ), 56.2 ( $\text{N}(\text{CH}_3)_4$ ) 210.6 ( $\text{CS}_2$ ). **Anal. Calc. for  $\text{C}_9\text{H}_{22}\text{N}_2\text{S}_2$ :** C, 48.60; H, 9.97; N, 12.06. Found: C, 48.41; H, 9.54; N, 11.73. **MS(EI):**  $m/z$  148 [ $\text{S}_2\text{CN}(\text{CH}_2\text{CH}_3)_2$ ].

**[NMe<sub>4</sub>][S<sub>2</sub>CNMeBu]** To an ice-cooled solution of Me<sub>4</sub>NOH (10 mmol, 3.65 g of a 25% wt solution in methanol) and MeBuNH (10 mmol) in methanol (50 mL), CS<sub>2</sub> (10 mmol, 0.60 mL) was added dropwise over five mins. The solution was allowed to come to room temperature and stirred overnight. Methanol was removed *in vacuo* resulting in a pale yellow crystalline powder. Yield 1.1578 g, 98 %.  $^1\text{H}$  NMR  $\delta$ /ppm ( $\text{CDCl}_3$ ): 0.91 (t, 3H,  $J$  = 7.4 Hz,  $\text{S}_2\text{CN}(\text{CH}_3)(\text{CH}_2)_3\text{CH}_3$ ), 1.31 (m, 2H,  $\text{CH}_2$ ), 1.65 (m, 2H,  $\text{CH}_2$ ), 3.51 (s, 3H,  $\text{S}_2\text{CN}(\text{CH}_3)(\text{CH}_2)_3\text{CH}_3$ ), 3.55 (s, 12H,  $\text{N}(\text{CH}_3)_4$ ), 4.14 (m, 2H,  $\text{CH}_2$ ).  $^{13}\text{C}\{^1\text{H}\}$  NMR  $\delta$ /ppm ( $\text{CDCl}_3$ ): 14.19 ( $\text{S}_2\text{CN}(\text{CH}_3)(\text{CH}_2)_3\text{CH}_3$ ), 20.32 ( $\text{CH}_2$ ), 29.44 ( $\text{CH}_2$ ), 42.41 ( $\text{CH}_2$ ), 59.00 ( $\text{S}_2\text{CN}(\text{CH}_3)(\text{CH}_2)_3\text{CH}_3$ ), 56.17 ( $\text{N}(\text{CH}_3)_4$ ) 211.77 ( $\text{CS}_2$ ). **Anal. Calc. for  $\text{C}_{10}\text{H}_{24}\text{N}_2\text{S}_2$ :** C, 50.80; H, 10.23; N, 11.85. Found: C, 49.47; H, 10.13; N, 11.41. **MS(EI):**  $m/z$  162 [ $\text{S}_2\text{CN}(\text{CH}_3)(\text{CH}_2)_3\text{CH}_3$ ].

### Apparatus used for decomposition studies

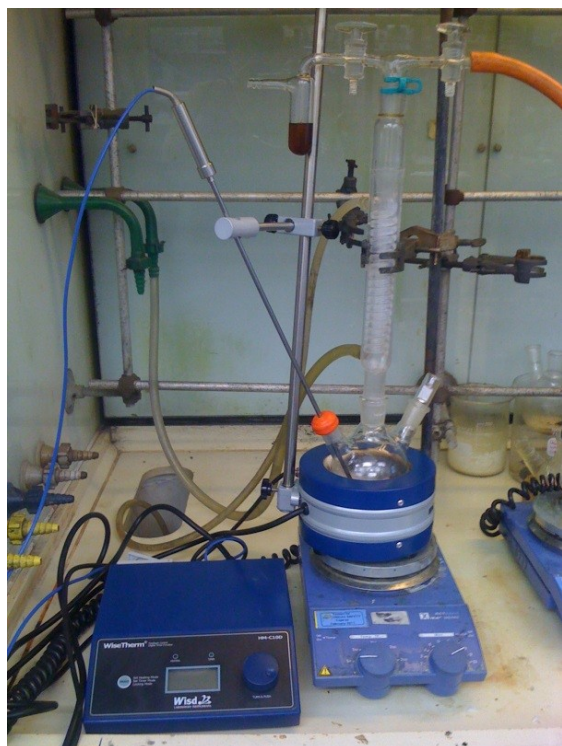

Supplement: c9na00262f1.pdf [file c9na00262f1.pdf]
